# Supplementary material for: Mode of iron(iii) chelation by hexadentate hydroxypyridinones
Source: Royal Society of Chemistry journal article supplement (doi:10.1039/c4cc10339d), 2015-01-01
Supplement: c4cc10339d1.pdf [file c4cc10339d1.pdf]

## Supporting Information

### Mode of iron(III) chelation by hexadentate hydroxypyridinones

Tao Zhou,<sup>a</sup> Robert Hider,<sup>b</sup> Xiaole Kong\*<sup>b</sup>

<sup>a</sup> Department of Applied Chemistry, School of Food Science and Biotechnology, Zhejiang Gongshang University, Hangzhou, Zhejiang, 310018, China

<sup>b</sup> Institute of Pharmaceutical Science, King's College London, Franklin-Wilkins Building, 150 Stamford Street, London, SE1 9NH, UK

E-mail: xiao.kong@kcl.ac.uk

### Contents

|                                                                                                                                                                                                                                                                                                                                                                                                                                             |       |
|---------------------------------------------------------------------------------------------------------------------------------------------------------------------------------------------------------------------------------------------------------------------------------------------------------------------------------------------------------------------------------------------------------------------------------------------|-------|
| <b>Figure S1.</b> High resolution mass spectrum of peak 779 provides evidence of doubly charged complex $[\text{Ga}_2^{\text{III}}(\text{L}-3\text{H})+2\text{K}]^{2+}$ . The complex was prepared from a 1:1 molar ratio of gallium chloride and NTA(BuHP) <sub>3</sub> ( <b>4</b> ) (100 μM) in water with stepwise addition of KOH(0.1M) to pH7.0. Sample was then diluted 10 fold in 1% formic acid and inject into the instrument..... | S2    |
| <b>Procedure for the synthesis of NTA(BuHP)<sub>3</sub></b> .....                                                                                                                                                                                                                                                                                                                                                                           | S3    |
| <b>MS experimental</b> .....                                                                                                                                                                                                                                                                                                                                                                                                                | S3-S4 |

6123 #123-161 RT: 2.29-2.74 AV: 28 NL: 1.00E5  
T: FTMS + p ESI Full ms [400.00-2000.00]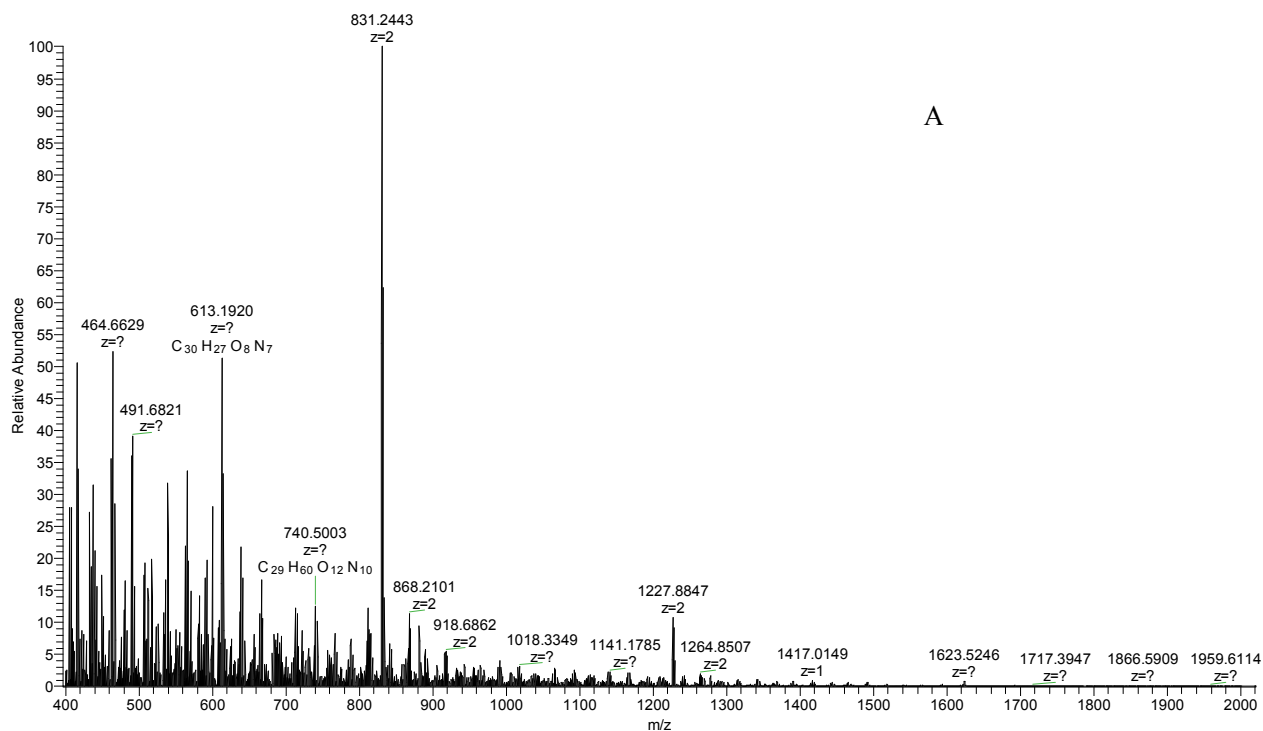6123 #123-161 RT: 2.29-2.74 AV: 28 NL: 1.00E5  
T: FTMS + p ESI Full ms [400.00-2000.00]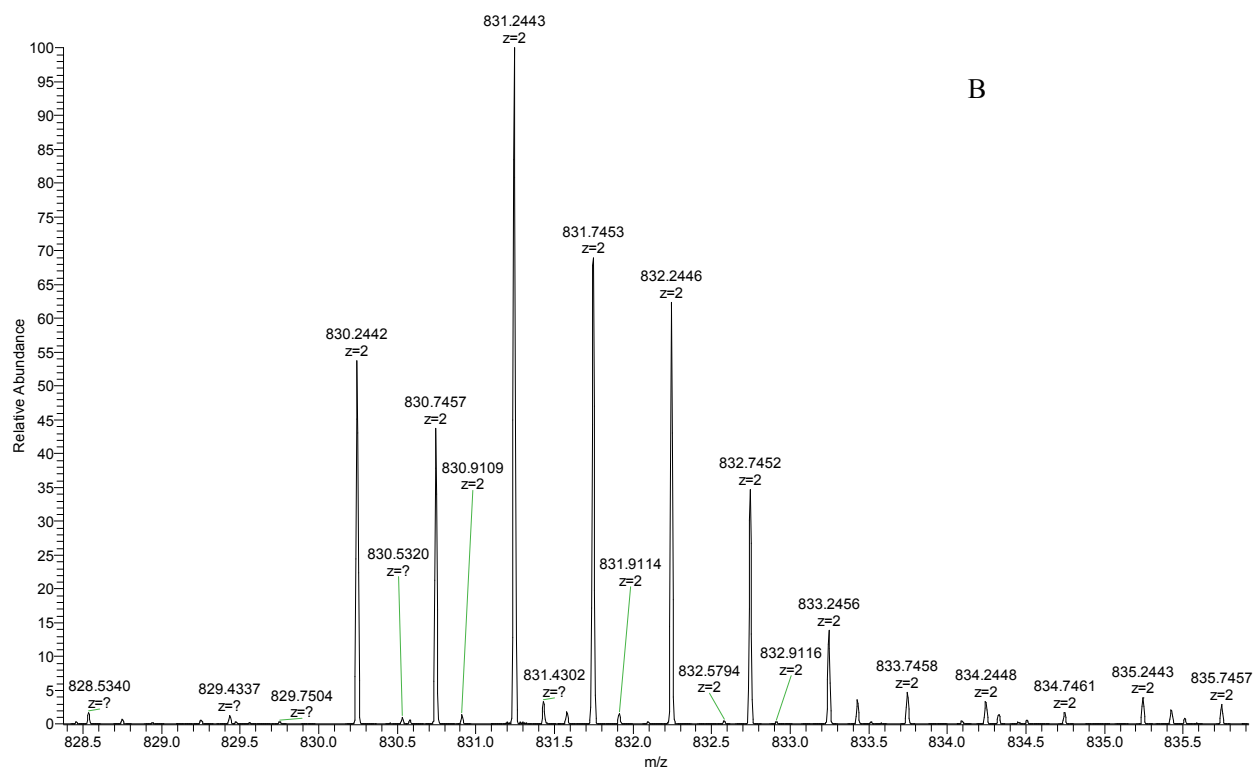

**Figure S1.** High resolution mass spectrum of peak 779 provides evidence of doubly charged complex  $[\text{Ga}_2^{\text{III}}(\text{L}-3\text{H})+2\text{K}]^{2+}$ . The complex was prepared from a 1:1 molar ratio of gallium chloride and NTA(BuHP)<sub>3</sub> (**4**) (100 $\mu\text{M}$ ) in water with stepwise addition of KOH(0.1M) to pH7.0. Sample was then diluted 10 fold in 1% formic acid and inject into the instrument.

**Synthesis of NTA(BuHP)<sub>3</sub> (4):** A mixture of nitrilotriacetic acid (0.191g, 1mmol), dihydrochloric salt of 1-(4-aminobutyl)-3-(benzyloxy)-2-methylpyridin-4(1*H*)-one (1.292g, 3.6mmol), 1-hydroxybenzotriazole (0.551g, 3.6mmol), 1,3-dicyclohexylcarbodiimide (0.742g, 3.6mmol) and *N*-methyl morpholine (0.79mL) in DMF (15mL) was stirred at room temperature for 2 days. After filtration, the filtrate was concentrated and the residue was purified by silica column chromatography using CH<sub>2</sub>Cl<sub>2</sub>/MeOH (6:1 to 2:1) as an eluent to provide benzyl protected NTA(BuHP)<sub>3</sub> as a pale yellow solid (0.52g, 52% yield). To a suspension of the protected NTA(BuHP)<sub>3</sub> (0.18g) and concentrated hydrochloric acid (0.15 mL) in MeOH (20 mL) was added 5 % Pd/C (0.09 g). Hydrogenation was carried out at 30 psi H<sub>2</sub> for 3 h. After filtration to remove the catalyst, the filtrate was concentrated to dryness. The residue was purified by crystallization from methanol/acetone. The hydrochloride of NTA(BuHP)<sub>3</sub> was obtained as a white solid (0.138g, 88% yield). <sup>1</sup>H NMR (DMSO-d<sub>6</sub>, 400MHz) δ 1.48 (m, 6H, CH<sub>2</sub>), 1.74 (m, 6H, CH<sub>2</sub>), 2.54 (s, 9H, CH<sub>3</sub>), 3.12 (m, 6H, CH<sub>2</sub>), 3.55 (br, 6H, CH<sub>2</sub>), 4.35 (t, *J*=7.6Hz, 6H, CH<sub>2</sub>), 7.35 (d, *J*=7.2Hz, 3H, C5-H in pyridinone), 8.32 (d, *J*=7.2Hz, 3H, C6-H in pyridinone), 8.81 (t, *J*=6.0Hz, 3H, NH); <sup>13</sup>C NMR (DMSO-d<sub>6</sub>, 100MHz) δ 12.44 (CH<sub>3</sub>), 25.57 (CH<sub>2</sub>), 26.97 (CH<sub>2</sub>), 30.68 (CH<sub>2</sub>), 37.58 (CH<sub>2</sub>), 55.43 (NCH<sub>2</sub>CO), 110.71 (C-5H in pyridinone), 137.97 (C-2 in pyridinone), 141.34 (C-3 in pyridinone), 142.93 (C-6 in pyridinone), 158.47 (C-4 in pyridinone), 206.47 (CONH). ESI-MS: *m/z* 726 [M+H]<sup>+</sup>.

#### **MS Instruments:**

**High resolution mass spectrometry** Thermo Exactive Benchtop Orbitrap with Instrument settings: Sheath Gas flow rate: 10; Aux gas flow rate: 0; Sweep gas flow rate: 0; Sprayvoltage: 4 kV; Capillary temp 250 °C; Capillary voltage: 60 V; Tube lens voltage: 120 V; Skimmer voltage: 25 V; Heater temp: 30 °C; Ion source: ESI positive mode; Resolution: Ultra High; Fragmentation: HCD Gas on.

**Electrospray ionization mass spectrometry** Samples were directly infused into a LCQ Deca XP ion trap mass spectrometer (ThermoFinnigan, San Jose, USA) using a 250 µl syringe at a flow rate of 5.0 µl/min. The instrument was operated in positive ion mode employing the following conditions:

source voltage 4.5 kV; capillary voltage 25 V; capillary temperature 100 to 300 °C and tube lens voltage 10 V.

#### **ESI-MS of the Gallium complex of NTA(BuHP)<sub>3</sub>:**

The MS displays a major peak at 831.2 (Figure S1A) which corresponds to complex consisting of a 1:1 molar ratio of gallium and NTA(BuHP)<sub>3</sub> (**4**), namely  $[\text{Ga}^{\text{III}}(\text{L}-3\text{H})+\text{K}]^+$ . With high resolution MS (Figure S1B), the peak was found to display a typical gallium isotope distribution, namely 830.24, 830.75, 831.24, 831.75, 832.24, 832.75, 833.24, where the peaks are separated by half mass units. This confirms that the peak 831.2 corresponds to a doubly charged dimer of mass 1662.4 corresponding to the complex  $[\text{Ga}_2^{\text{III}}(\text{L}-3\text{H})_2+2\text{K}]^{2+}$ .
